# Supplementary material for: EZH2 Inhibitor GSK126 Suppresses Antitumor Immunity by Driving Production of Myeloid-Derived Suppressor Cells
Source: Oxford University Press journal article supplement (doi:10.1158/0008-5472.can-18-2395), 2019-02-08
Supplement: 00085472can182395-sup-206394_3_supp_5300335_pldd70.docx [file 00085472can182395-sup-206394_3_supp_5300335_pldd70.docx]

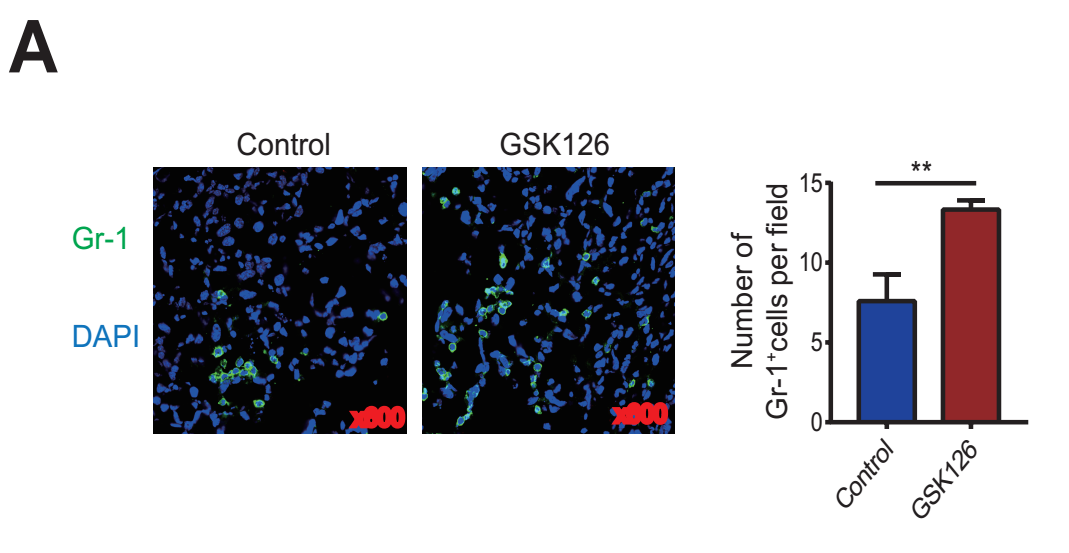


**Supplementary Figure S4.**

**GSK126 results in accumulation of MDSCs in the TME**. Immunofluorescence staining of Gr-1 in tumor tissue. Significance was assessed by two-tailed unpaired Student’s t-test, *p < 0.05, **p < 0.01, ***p < 0.001.
