# Supplementary material for: EZH2 Inhibitor GSK126 Suppresses Antitumor Immunity by Driving Production of Myeloid-Derived Suppressor Cells
Source: Oxford University Press journal article supplement (doi:10.1158/0008-5472.can-18-2395), 2019-02-08
Supplement: 00085472can182395-sup-206394_3_supp_5300337_pljj70.docx [file 00085472can182395-sup-206394_3_supp_5300337_pljj70.docx]

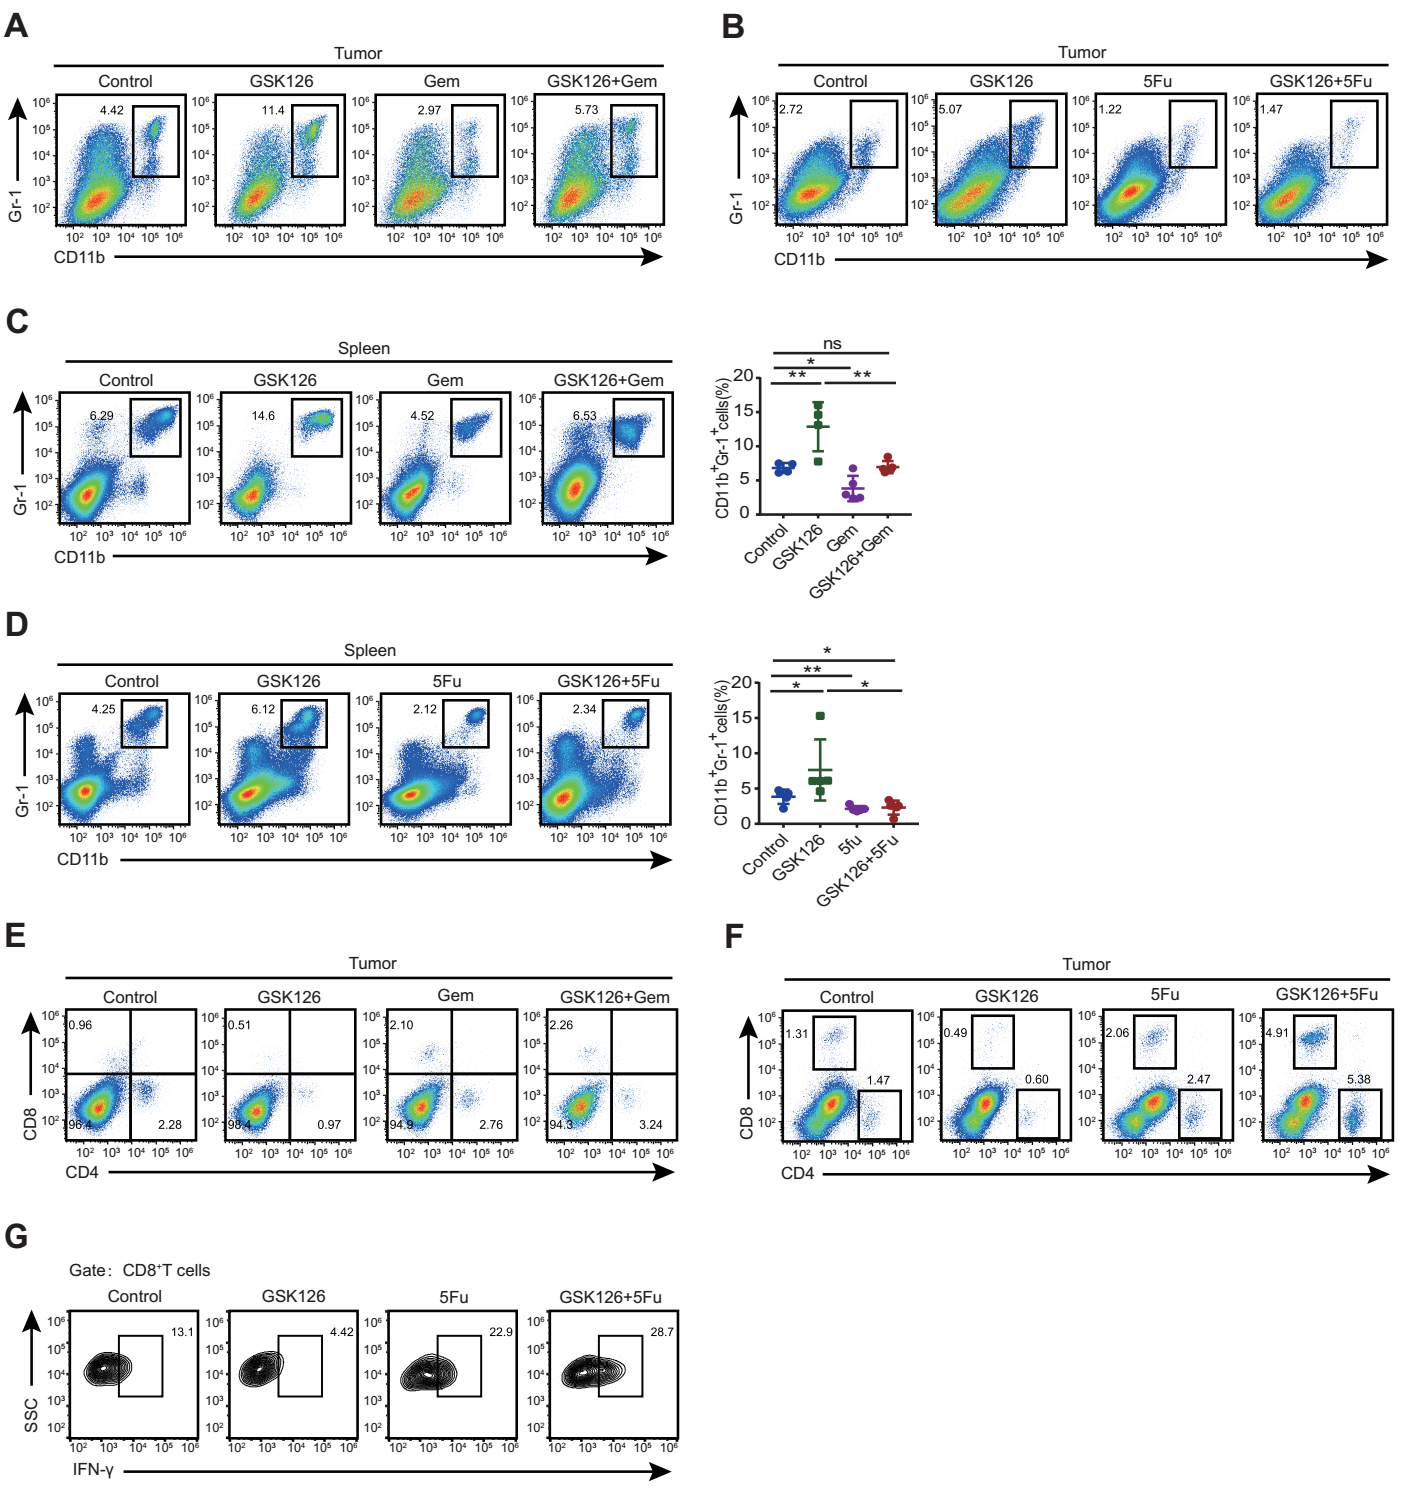


**Supplementary Figure S6.**

**GSK126+gemcitabine/5Fu treatment leads to reduced myeloid derived suppressor cell (MDSC) numbers and increased T cell numbers and activity**. **A**–**D,** Percentage of MDSCs in tumor tissues and spleen. **E, F,** Percentage of intratumoral CD4+ and CD8+ T cells. **G,** IFN-γ expression by intratumoral CD8+T cells. Two-way ANOVA with Turkey’s multiple comparison post-test **(C,D**) was used to evaluate statistical significance (*p<0.05, **p<0.01, ***p<0.001).
