# Supplementary material for: EZH2 Inhibitor GSK126 Suppresses Antitumor Immunity by Driving Production of Myeloid-Derived Suppressor Cells
Source: Oxford University Press journal article supplement (doi:10.1158/0008-5472.can-18-2395), 2019-02-08
Supplement: 00085472can182395-sup-206394_3_supp_5300342_pl5570.docx [file 00085472can182395-sup-206394_3_supp_5300342_pl5570.docx]

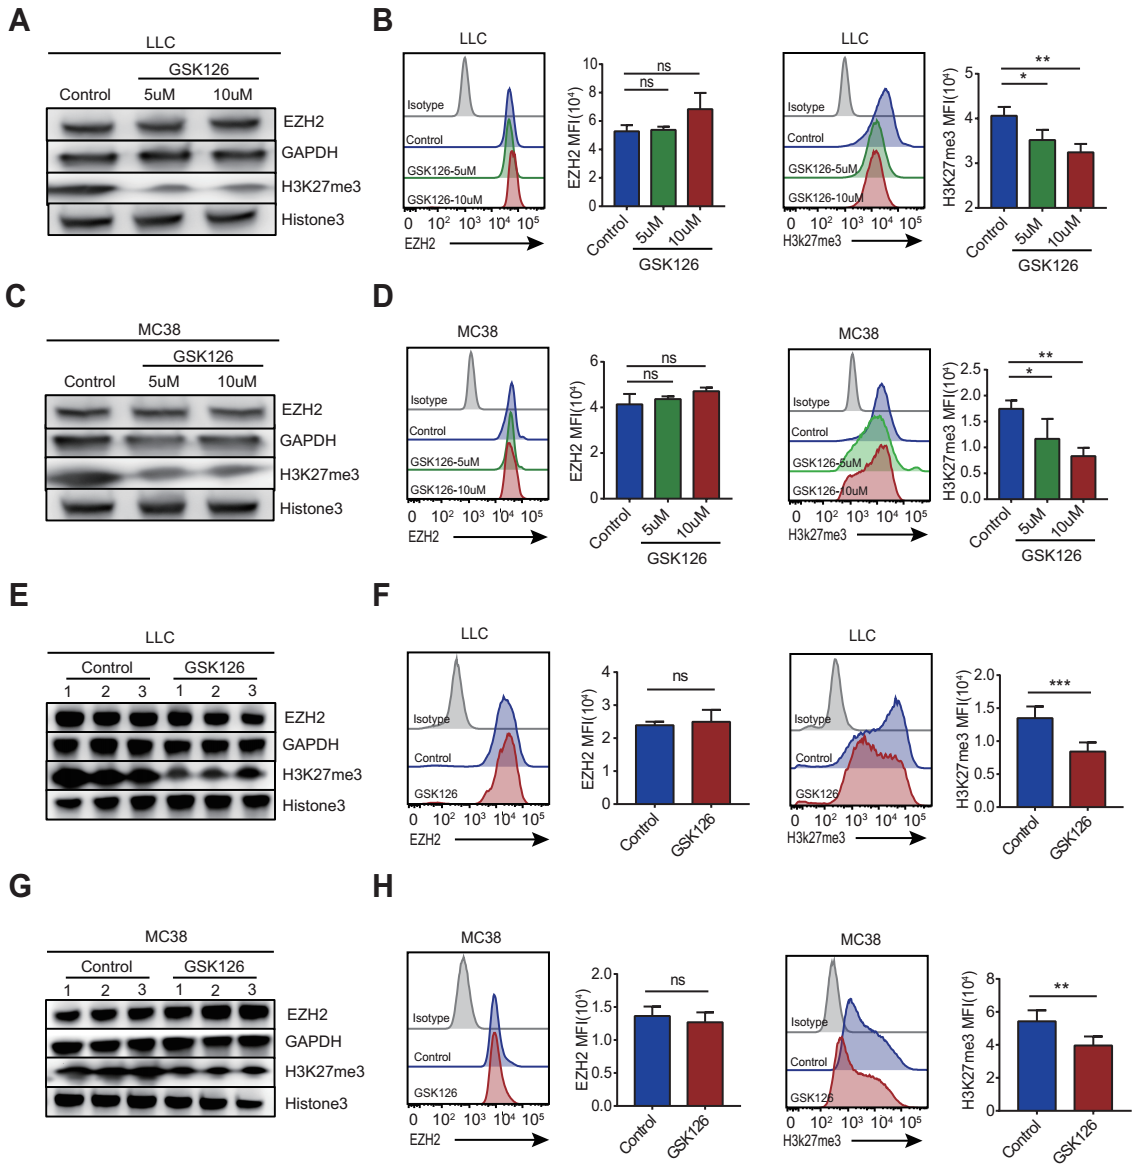


**Supplementary Figure S1.**

**GSK126 treatment does not affect EZH2 protein levels but decreases H3K27 trimethylation in LLC and MC38 cells in vitro and in vivo.****A**,**C**, EZH2, H3K27me3, Histone3, and GAPDH levels were analyzed by immunoblotting of LLC and MC38 cells in vitro. **B**,**D**, EZH2 and H3K27me3 were analyzed by flow cytometry of LLC and MC38 cells in vitro (n=3). **E,G,** EZH2, H3K27me3, Histone3, GAPDH levels were analyzed by immunoblotting of tumor tissues from LLC and MC38 tumor-bearing mice (n=3). **F**,**H**, EZH2 and H3K27me3 were analyzed by flow cytometry in tumor tissues from LLC and MC38 tumor-bearing mice (n=5).One-way ANOVA with Turkey’s multiple comparison post-test **(B,D**) and a two-tailed unpaired Student’s t-test(**F,H**) was used to evaluate statistical significance (*p<0.05, **p<0.01, ***p<0.001).
